# Supplementary material for: Hydraena (s.str.) dinarica, new species (Coleoptera: Hydraenidae) along with further records of Hydraena spp. from Durmitor National Park, Montenegro and comments on the DNA barcoding problem with the genus
Source: Biodivers Data J. 2021 Jan 12;9:e59892. doi: 10.3897/BDJ.9.e59892 (PMC7815695; doi:10.3897/BDJ.9.e59892)
Supplement: Supplementary material 1 — Intra- and interspecific COI sequence divergence (K2P). [file bdj-09-e59892-s001.xlsx]

## Sheet: Supplement 1 Freitag et al.
		1	2	3	4	5	6	7	8	9	10	11	12	13	14	15	16	17	18	19	20	21	22	23	24	25	26
1	H68 BC12 H. dinarica sp.n.
2	KU906877 H. saga	0.006
3	HE970902 H. alpicola	0.006	0
4	KU912591 H. gracilis	0.025	0.025	0.025
5	KM444579 H. gracilis	0.022	0.022	0.022	0.003
6	KU907756 H. excisa	0.038	0.039	0.039	0.03	0.03
7	KU916374 H. excisa	0.038	0.039	0.039	0.03	0.03	0
8	HE970890 H. larissae	0.033	0.031	0.031	0.028	0.028	0.033	0.033
9	HE970921 H. diazi	0.033	0.031	0.031	0.028	0.031	0.03	0.03	0.015
10	HF947945 H. fosterorum	0.035	0.036	0.036	0.028	0.031	0.031	0.031	0.019	0.005
11	H63 BC09 H. subintegra	0.086	0.086	0.086	0.095	0.092	0.1	0.1	0.088	0.093	0.097
12	HE970899 H. subintegra	0.085	0.084	0.084	0.09	0.086	0.095	0.095	0.083	0.088	0.091	0.005
13	LT991252 H. croatica	0.126	0.126	0.126	0.119	0.119	0.126	0.126	0.115	0.119	0.121	0.136	0.134
14	H61 BC08 H. nigrita	0.123	0.124	0.124	0.123	0.124	0.13	0.13	0.123	0.119	0.121	0.141	0.137	0.129
15	KU917836 H. nigrita	0.123	0.124	0.124	0.123	0.124	0.13	0.13	0.123	0.119	0.121	0.145	0.141	0.129	0.003
16	H65 BC10 H. cf. britteni	0.136	0.134	0.134	0.138	0.134	0.145	0.145	0.13	0.138	0.139	0.155	0.155	0.142	0.127	0.127
17	KJ964025 H. britteni	0.139	0.138	0.138	0.138	0.138	0.145	0.145	0.13	0.138	0.139	0.159	0.159	0.14	0.129	0.129	0.003
18	KU919146 H. britteni	0.137	0.136	0.136	0.136	0.136	0.139	0.139	0.124	0.132	0.134	0.157	0.153	0.136	0.123	0.123	0.005	0.005
19	H66 BC11 H. sp. female	0.13	0.123	0.123	0.136	0.132	0.143	0.143	0.132	0.136	0.139	0.155	0.155	0.138	0.123	0.12	0.023	0.027	0.025
20	HE970906 H. melas	0.134	0.137	0.137	0.128	0.124	0.141	0.141	0.128	0.134	0.132	0.158	0.156	0.134	0.105	0.105	0.107	0.111	0.106	0.102
21	H62 BC08 H. morio	0.139	0.133	0.133	0.158	0.154	0.147	0.147	0.147	0.145	0.148	0.154	0.154	0.146	0.132	0.128	0.131	0.131	0.133	0.118	0.126
22	H64 BC09 H. morio	0.139	0.133	0.133	0.158	0.154	0.147	0.147	0.147	0.145	0.148	0.154	0.154	0.146	0.132	0.128	0.131	0.131	0.133	0.118	0.126	0
23	H71 Sanger H. morio	0.139	0.133	0.133	0.158	0.154	0.147	0.147	0.147	0.145	0.148	0.154	0.154	0.146	0.132	0.128	0.131	0.131	0.133	0.118	0.126	0	0
24	H70 Sanger H. morio	0.139	0.133	0.133	0.158	0.154	0.147	0.147	0.147	0.145	0.148	0.154	0.154	0.146	0.132	0.128	0.131	0.131	0.133	0.118	0.126	0	0	0
25	H69 sanger H. biltoni	0.141	0.135	0.135	0.16	0.156	0.149	0.149	0.148	0.147	0.15	0.154	0.154	0.149	0.132	0.128	0.135	0.135	0.137	0.122	0.13	0.003	0.003	0.003	0.003
26	KM443241 H. minutissima	0.152	0.146	0.146	0.156	0.152	0.167	0.167	0.16	0.154	0.158	0.176	0.178	0.168	0.151	0.151	0.143	0.147	0.149	0.136	0.132	0.153	0.153	0.153	0.153	0.157
27	H60 BC07 H. minutissima	0.152	0.146	0.146	0.156	0.152	0.167	0.167	0.16	0.154	0.158	0.176	0.178	0.17	0.153	0.153	0.145	0.149	0.151	0.138	0.13	0.155	0.155	0.155	0.155	0.159	0.002
